# Supplementary material
Source: PubMed Central journal article supplement (PMC4084541)
Supplement: rstb20130256supp1.pdf [file rstb20130256supp1.pdf]

Vallejo-Marín, M. *et al.* 2014. Recurrent modification of floral morphology in heterantherous *Solanum* reveals a parallel shift in reproductive strategy. *Phil. Trans. R. Soc. B.* **369** doi: 10.1098/rstb.2013.0256.

### Supplementary material

**Table S1.** Sampled localities of the six taxa of *Solanum* Section *Androceras* studied here. Taxonomic classification follows Whalen (1979). Only one accession number is given for each locality.

| Species                                       | Accessions | Localities                      | Latitude (N) | Longitude (W) | Elevation (m) |
|-----------------------------------------------|------------|---------------------------------|--------------|---------------|---------------|
| <b><u>Series Androceras</u></b>               |            |                                 |              |               |               |
| <i>S. rostratum</i>                           | 10s40      | Peña de Bernal, Querétaro       | 20.74°       | 99.94°        | 2283          |
| <i>S. fructo-tecto</i>                        | 10-AH-3    | Atitalaquia, Hidalgo            | 20.07°       | 99.22°        | 2090          |
| <b><u>Series Pacificum</u></b>                |            |                                 |              |               |               |
| <i>S. grayi</i> var. <i>grandiflorum</i>      | 07s1       | Río Piaxtla, Sinaloa            | 23.89°       | 106.62°       | 78            |
|                                               | 07s197     | Los Zapotes, Sinaloa            | 23.45°       | 106.47°       | 46            |
|                                               | 08s50      | Tejupilco, Edo. México          | 18.85°       | 100.13°       | 1532          |
| <i>S. grayi</i> var. <i>grayi</i>             | 07s15      | Highway 15-km 81, Sinaloa       | 25.34°       | 107.95°       | 93            |
|                                               | 07s187     | Intersection, Álamos, Sonora    | 27.00°       | 108.93°       | 385           |
| <b><u>Series Violaceiflorum</u></b>           |            |                                 |              |               |               |
| <i>S. citrullifolium</i>                      | 894750197  | Nijmegen, Solanaceae Collection | NA           | NA            | NA            |
|                                               | 894750332  |                                 |              |               |               |
| <i>S. heterodoxum</i> var. <i>heterodoxum</i> | 10-FZ-24   | Fresnillo, Zacatecas            | 23.10°       | 102.80°       | 2154          |

**Table S2.** Loadings of the principal component analysis of 10 floral traits across six taxa in *Solanum* Section *Androceras*.

| <b>Trait</b>                             | <b>PC1</b> | <b>PC2</b> | <b>PC3</b> | <b>PC4</b> | <b>PC5</b> | <b>PC6</b> | <b>PC7</b> | <b>PC8</b> | <b>PC9</b> | <b>PC10</b> |
|------------------------------------------|------------|------------|------------|------------|------------|------------|------------|------------|------------|-------------|
| <b>Corolla width</b>                     | 0.648      | 0.21       | 0.52       | 0.503      | 0.008      | -0.106     | 0.01       | 0.009      | -0.023     | 0.011       |
| <b>Corolla length</b>                    | 0.617      | 0.298      | -0.252     | -0.658     | 0.177      | 0.012      | -0.03      | -0.01      | 0.04       | 0           |
| <b>PA width</b>                          | 0.037      | -0.109     | 0.023      | -0.099     | -0.049     | -0.129     | 0.101      | -0.165     | -0.943     | 0.178       |
| <b>PA length</b>                         | 0.227      | -0.221     | -0.337     | 0.114      | -0.434     | -0.221     | 0.563      | -0.422     | 0.201      | -0.001      |
| <b>FA width</b>                          | 0.018      | -0.022     | 0.001      | -0.012     | -0.012     | -0.041     | 0.045      | 0.031      | -0.176     | -0.982      |
| <b>FA length</b>                         | 0.123      | -0.168     | -0.25      | 0.08       | -0.092     | -0.324     | 0.184      | 0.856      | -0.059     | 0.065       |
| <b>Distance PA-FA</b>                    | 0.162      | -0.069     | 0.003      | -0.067     | -0.763     | 0.489      | -0.344     | 0.143      | -0.068     | -0.004      |
| <b>Distance FA-stigma</b>                | 0.167      | -0.363     | -0.012     | 0.082      | 0.356      | 0.718      | 0.421      | 0.109      | -0.05      | 0.007       |
| <b>Distance PA-stigma</b>                | 0.076      | -0.649     | 0.548      | -0.433     | -0.029     | -0.233     | -0.047     | -0.007     | 0.166      | -0.001      |
| <b>Style length</b>                      | 0.264      | -0.468     | -0.434     | 0.295      | 0.243      | -0.094     | -0.582     | -0.168     | -0.013     | -0.017      |
| <b>Proportion of variance explained</b>  | 0.8805     | 0.0687     | 0.0156     | 0.0136     | 0.0083     | 0.0073     | 0.0037     | 0.0014     | 0.0007     | 0.0001      |
| <b>Cumulative proportion of variance</b> | 0.8805     | 0.9492     | 0.9648     | 0.9784     | 0.9867     | 0.9940     | 0.9977     | 0.9992     | 0.9999     | 1.0000      |

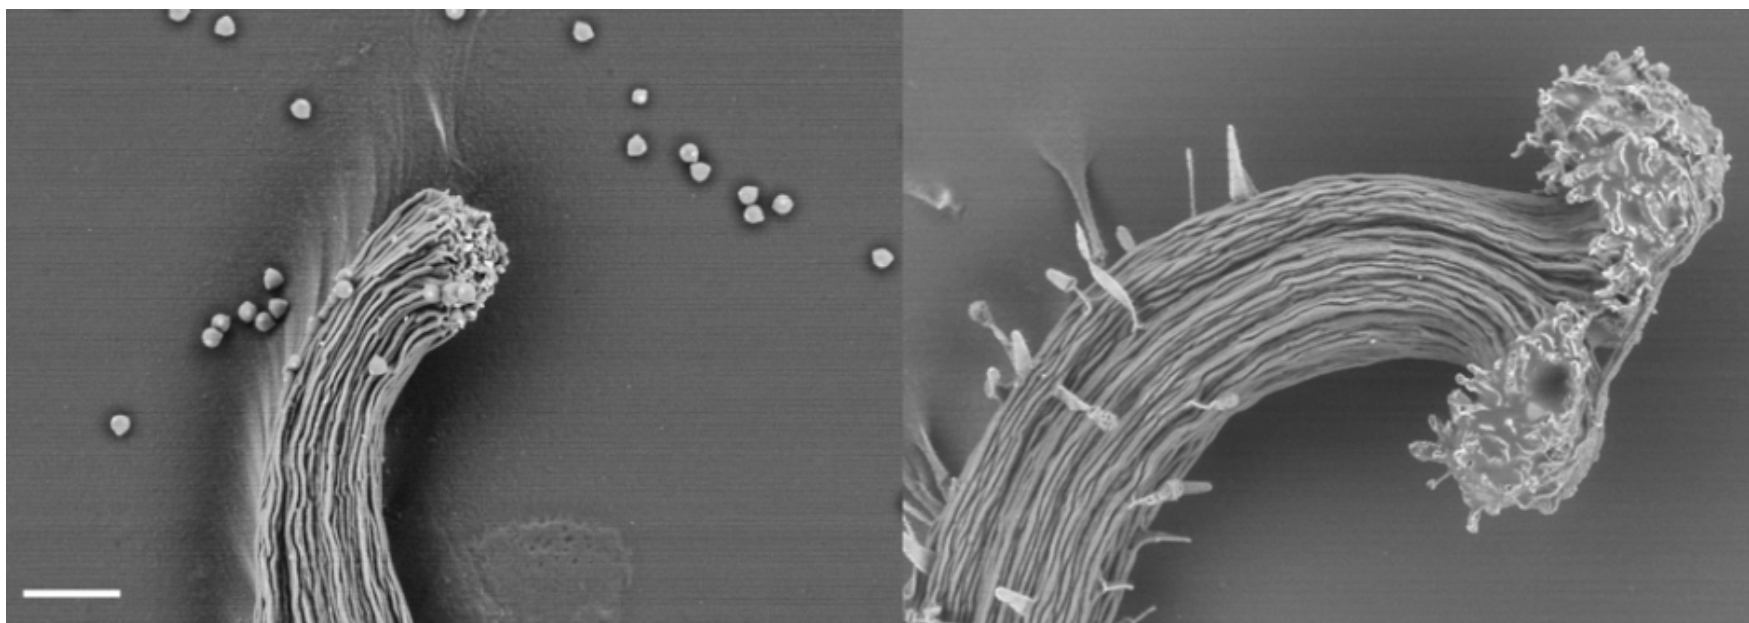

**Figure S1.** Electron micrograph of the stigma of *Solanum rostratum* (left) and *S. fructo-tecto* (right). Notice the pollen grains in the image for *S. rostratum* (Bar = 100  $\mu\text{m}$ ; Zeiss, EVOMA15; 20 kV, WD = 7.5 mm, 63 Pa).
